# Supplementary material for: HBx 128–133 Deletion Affecting HBV Mother-to-Child Transmission Weakens HBV Replication via Reducing HBx Level and CP/ENII Transcriptional Activity
Source: MDPI journal article supplement (doi:10.3390/v14091887), 2022-08-26
Supplement: s1 [file s1]

**HBx 128-133 deletion affecting HBV mother-to-child transmission weakens HBV replication via reducing HBx level and CP/ENII transcriptional activity**

Yarong Song<sup>1,2</sup>, Ying Lu<sup>1</sup>, Yi Li<sup>1</sup>, Minmin Liu<sup>1</sup>, Hui Zhuang<sup>1</sup>, Jie Li<sup>1,\*</sup> and Jie Wang<sup>1,2,\*</sup>

<sup>1</sup>Department of Microbiology & Infectious Disease Center, School of Basic Medical Sciences, Peking University Health Science Center, Beijing 100191, China.

<sup>2</sup>NHC Key Laboratory of Medical Immunology/Immunology Research Platform of Peking University, Beijing 100191, China.

\*Correspondence: [jieli@hsc.pku.edu.cn](mailto:jieli@hsc.pku.edu.cn) (J.L.); [wangjie2015@hsc.pku.edu.cn](mailto:wangjie2015@hsc.pku.edu.cn) (J.W.);

Tel.: +86-10-82805133 (J.L.); +86-10-82805137 (J.W.)

**Table S1. Nucleotide sites of HBV coding regions**

| HBV coding region | Nucleotide sites |
|-------------------|------------------|
| PreS1             | nt2848-3204      |
| PreS2             | nt3205-154       |
| S                 | nt155-835        |
| PreC              | nt1814-1900      |
| C                 | nt1901-2452      |
| X                 | nt1374-1838      |
| RT                | nt130-1161       |

**Table S2. Sequences of primers used for amplification and sequencing of HBV X region.**

| Primers                      | Primers sequences (5'-3')    |
|------------------------------|------------------------------|
| Outer primer                 | F: TCTGCCAAGTGTTTGCTGACGC    |
| Nested PCR for amplification | R: TAGCTTGCCTGAGTGCTGTATGGTG |
|                              | Inner primer                 |
|                              | F: CCTCTGCCGATCCATACTGCG     |
|                              | R: GGTTGGAGGCTTGAACAGTAGGA   |
| Direct sequencing            | CCTCTGCCGATCCATACTGCG        |

F: forward, R: reverse.

**Table S3. Sequences of primers used for plasmid construction**

| Primer names             | Primers sequences (5'-3')                                                                                      |
|--------------------------|----------------------------------------------------------------------------------------------------------------|
| Site-directed mutation F | AGGAGTTGGGGGAGGAGATTCTGGGAGGCTGT<br>AGGCATAA                                                                   |
| Site-directed mutation R | TTATGCCTACAGCCTCCCAGAATCTCCTCCCCCA<br>ACTCCT                                                                   |
| pCDH-HBx-3×flag F        | CGGAATTCATGGCTGCTCGGGTGTG                                                                                      |
| pCDH-HBx-3×flag R        | GCTCTAGATTACTTGTTCATCGTCATCCTTGTAAGTC<br>GATGTCATGATCTTTATAATCACCGTCATGGTCTT<br>TGTAAGTCGGCAGAGGTGAAAAAGTTGCAT |

F: forward, R: reverse.

**Table S4. Sequences of primers used for HBV DNA and HBV RNA quantification**

| Quantitative markers | Primers sequences (5'-3')                                    |
|----------------------|--------------------------------------------------------------|
| HBV DNA              | F: CCGTCTGTGCCTTCTCATCTG<br>R: AGTCCAAGAGTCCTCTTATGTAAGACCTT |
| HBV 3.5 kb RNA       | F: GAGTGTGGATTCGCACTCC<br>R: GAGGCGAGGGAGTTCTTCT             |
| HBV total RNA        | F: AAGCCACCCAAGGCACAG<br>R: GCACCAGCACCATGCAAC               |
| <i>ACTB</i> mRNA     | F: ACTGTGCCCATCTACGAGG<br>R: CAGGCAGCTCGTAGCTCTT             |

F: forward, R: reverse.

**Table S5. The baseline characteristics between 249 eligible mother-infant pairs and 22 randomly selected mother-infant pairs in the immunoprophylaxis success group.**

|                                                   | Eligible mother-<br>infant pairs | Randomly selected<br>mother-infant pairs | <i>P</i> |
|---------------------------------------------------|----------------------------------|------------------------------------------|----------|
| <b>Mothers</b>                                    |                                  |                                          |          |
| Number                                            | 249                              | 22                                       |          |
| Age (years), median (range)                       | 25.50 (18.50-37.00)              | 25.00 (20.00-35.00)                      | 0.731    |
| HBsAg (log <sub>10</sub> IU/mL), median (range)   | 4.50 (3.40-5.22)                 | 4.51 (3.78-4.91)                         | 0.921    |
| HBeAg (log <sub>10</sub> S/CO), median (range)    | 3.15 (2.70-3.28)                 | 3.15 (3.03-3.28)                         | 0.641    |
| HBV DNA (log <sub>10</sub> IU/mL), median (range) | 8.13 (7.01-9.11)                 | 8.28 (7.18-8.72)                         | 0.415    |
| ALT (<40 U/L), n (%)                              | 249 (100.00)                     | 22 (100.00)                              | -        |
| Genotype C2, n (%)                                | 249 (100.00)                     | 22 (100.00)                              | -        |
| <b>Infants</b>                                    |                                  |                                          |          |
| Gender, male: female                              | 130:119                          | 9:13                                     | 0.309    |
| Birth weight (kg), median (range)                 | 3.40 (2.40-4.50)                 | 3.30 (2.60-4.25)                         | 0.295    |
| Parturition manner, cesarean: vaginal             | 167:82                           | 11:11                                    | 0.106    |
| Feeding pattern, breast <sup>a</sup> : artificial | 57:192                           | 8:14                                     | 0.156    |
| Infant's age at first dose of                     |                                  |                                          |          |
| <12 h                                             | 237 (95.18)                      | 22 (100.00)                              | 0.607    |
| HepB (hours), n (%)                               |                                  |                                          |          |
| 12-24 h                                           | 12 (4.82)                        | 0                                        |          |

<sup>a</sup>Breast-feeding included mixed feeding.

**Table S6. The baseline characteristics between the immunoprophylaxis failure and success group used for analysis of HBV X region sequences.**

|                                                   | Immunoprophylaxis<br>success group | Immunoprophylaxis<br>failure group | <i>P</i> |
|---------------------------------------------------|------------------------------------|------------------------------------|----------|
| <b>Mothers</b>                                    |                                    |                                    |          |
| Number                                            | 120                                | 22                                 |          |
| Age (years), median (range)                       | 24.00 (18.50-37.00)                | 25.50 (19.00-34.00)                | 0.680    |
| HBsAg (log <sub>10</sub> IU/mL), median (range)   | 4.49 (3.40-4.91)                   | 4.49 (3.49-.488)                   | 0.630    |
| HBeAg (log <sub>10</sub> S/CO), median (range)    | 3.15 (2.73-3.28)                   | 3.16 (2.90-3.23)                   | 0.946    |
| HBV DNA (log <sub>10</sub> IU/mL), median (range) | 8.22 (7.15-8.96)                   | 8.23 (7.48-8.96)                   | 0.953    |
| ALT (<40 U/L), n (%)                              | 120 (100.00)                       | 22 (100.00)                        | -        |
| Genotype C2, n (%)                                | 120 (100.00)                       | 22 (100.00)                        | -        |
| <b>Infants</b>                                    |                                    |                                    |          |
| Gender, male: female                              | 60:60                              | 13:9                               | 0.433    |
| Birth weight (kg), median (range)                 | 3.40 (2.60-4.30)                   | 3.55 (2.60-4.00)                   | 0.212    |
| Parturition manner, cesarean: vaginal             | 71:49                              | 12:10                              | 0.686    |
| Feeding pattern, breast <sup>a</sup> : artificial | 27:93                              | 7:15                               | 0.346    |
| Infant's age at first dose of                     |                                    |                                    |          |
| <12 h                                             | 112 (93.33)                        | 19 (86.36)                         | 0.490    |
| HepB (hours), n (%)                               |                                    |                                    |          |
| 12-24 h                                           | 8 (6.67)                           | 3 (13.64)                          |          |

<sup>a</sup>Breast-feeding included mixed feeding.

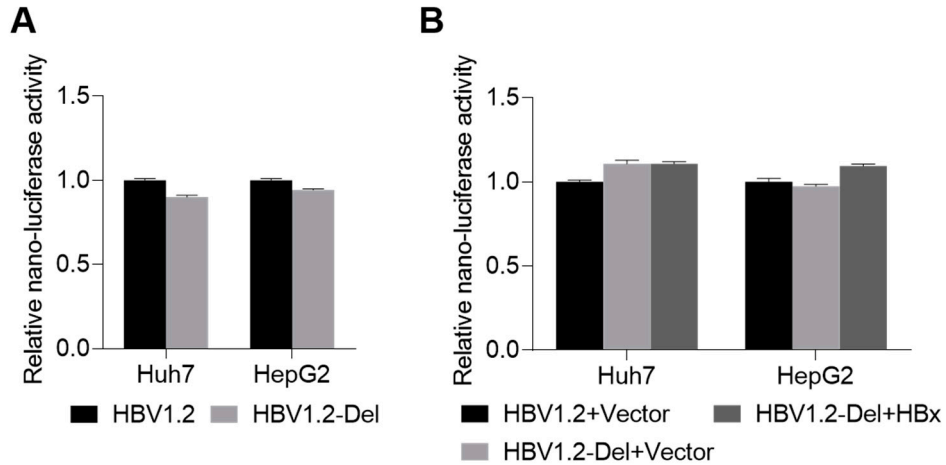

**Figure S1. The transfection efficiency among different groups in Huh7 and HepG2 cells.** The transfection efficiency was reflected by Nano-luciferase activity. (A) The pBB4.5-HBV1.2 or pBB4.5-HBV1.2-Del plasmid and pCDH-Nluc plasmid were co-transfected into Huh7 and HepG2 cells ( $5 \times 10^5$  cells/well in 6-well plate), and then the Nano-luciferase activity was detected by Nano-luciferase assays at 72 h after co-transfection. (B) The pBB4.5-HBV1.2 or pBB4.5-HBV1.2-Del, pCDH-HBx-3 $\times$ flag or pCDH vector and pCDH-Nluc plasmids were co-transfected into Huh7 and HepG2 cells ( $5 \times 10^5$  cells/well in 6-well plate), and then the Nano-luciferase activity was detected by Nano-luciferase assays at 72 h after co-transfection.

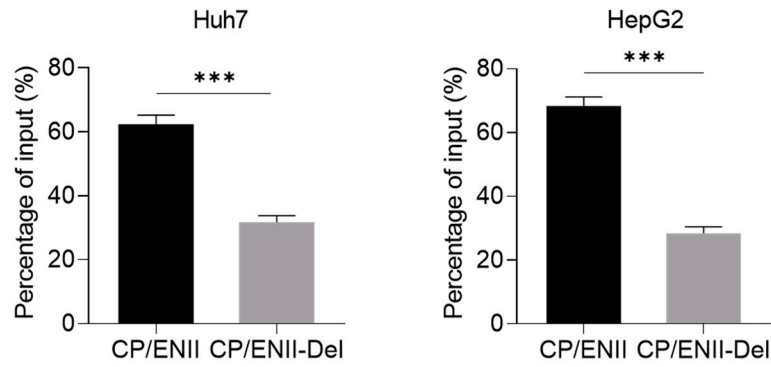

**Figure S2. The effect of nt1755-1772del on HBV CP/ENII transcriptional activity.**

The pCDH-flag-HNF4 $\alpha$  and pGL3-CP/ENII or pGL3-CP/ENII-Del plasmids were co-transfected into Huh7 and HepG2 cells ( $3 \times 10^6$  cells/well in 10 cm dish), and then the binding capacity between HNF4 $\alpha$  and HBV CP/ENII was detected by ChIP-PCR at 48 h after co-transfection. The relative amount of chromatin enrichment (percentage of the input) in ChIP-PCR was analyzed by gray value analyses. \*\*\* $P < 0.001$ , Student's  $t$ -test.
